# Supplementary material
Source: bioRxiv or medRxiv preprint supplement (https://medrxiv.org/highwire/filestream/80982/field_highwire_adjunct_files/0/2020.05.11.20096263-1.pdf)

1 **Supplementary Table 1: Matched Healthy Controls Characteristics**

2 Abbreviations: PEMC: pre-existing medical conditions

| ID   | Gender | Age | PEMC | PEMC Details                       |
|------|--------|-----|------|------------------------------------|
| 7062 | m      | 19  | no   |                                    |
| 7263 | m      | 19  | no   |                                    |
| 6998 | m      | 39  | no   |                                    |
| 7100 | m      | 39  | no   |                                    |
| 7262 | m      | 41  | no   |                                    |
| 7043 | m      | 42  | no   |                                    |
| 7286 | m      | 45  | yes  | Hypertension                       |
| 7542 | m      | 45  | no   |                                    |
| 6992 | m      | 47  | yes  | Hypertension                       |
| 7248 | m      | 47  | yes  | Asthma                             |
| 7059 | m      | 48  | no   |                                    |
| 7268 | m      | 48  | no   |                                    |
| 7051 | m      | 51  | no   |                                    |
| 7211 | m      | 51  | no   |                                    |
| 7553 | m      | 51  | no   |                                    |
| 7578 | m      | 51  | no   |                                    |
| 7278 | m      | 53  | yes  | Hypothyroidism                     |
| 7254 | m      | 54  | no   |                                    |
| 7007 | m      | 56  | no   |                                    |
| 7050 | m      | 56  | no   |                                    |
| 7055 | m      | 56  | no   |                                    |
| 7126 | m      | 56  | yes  | Hypertension, hypercholesterolemia |
| 7136 | m      | 56  | no   |                                    |
| 7252 | m      | 56  | yes  | Hypertension, hypothyroidism       |
| 7270 | m      | 56  | no   |                                    |
| 7288 | m      | 56  | no   |                                    |
| 7557 | m      | 56  | yes  | Asthma                             |
| 7027 | m      | 57  | yes  | Hypertension                       |
| 7057 | m      | 57  | no   |                                    |
| 7061 | m      | 57  | yes  | Hypertension, hypothyroidism       |
| 7094 | m      | 57  | no   |                                    |
| 7117 | m      | 58  | no   |                                    |
| 7118 | m      | 58  | yes  | Hypertension                       |
| 7044 | m      | 59  | yes  | Hypercholesterolemia, glaukoma     |
| 7096 | m      | 59  | no   |                                    |
| 7008 | m      | 60  | no   |                                    |
| 7028 | m      | 60  | yes  | Hypertension                       |
| 7099 | m      | 60  | yes  | Hypercholesterolemia               |
| 7026 | m      | 61  | no   |                                    |
| 7016 | m      | 62  | no   |                                    |
| 7267 | m      | 62  | no   |                                    |
| 7213 | m      | 63  | no   |                                    |
| 7624 | m      | 63  | yes  | Prostatahyperplasia                |
| 7078 | m      | 65  | no   |                                    |
| 7180 | m      | 65  | no   |                                    |
| 7013 | m      | 67  | yes  | Hypertension                       |
| 7032 | m      | 68  | yes  | Hypertension                       |
| 7284 | m      | 69  | no   |                                    |
| 7185 | f      | 47  | no   |                                    |
| 7433 | f      | 47  | no   |                                    |
| 7562 | f      | 47  | no   |                                    |
| 7547 | f      | 48  | no   |                                    |
| 6987 | f      | 56  | yes  | Hypertension                       |

|      |   |    |     |                              |
|------|---|----|-----|------------------------------|
| 7049 | f | 56 | no  |                              |
| 7095 | f | 56 | no  |                              |
| 7004 | f | 59 | no  |                              |
| 7002 | f | 60 | no  |                              |
| 7227 | f | 61 | yes | Hypertension                 |
| 7246 | f | 62 | yes | Hypertension, hypothyroidism |
| 7189 | f | 69 | no  |                              |

4 **Supplementary Table 2: Antibodies and Reagents**

| <b>Total Count Assay: Antibodies and Reagents</b>   |                |               |               |              |                 |
|-----------------------------------------------------|----------------|---------------|---------------|--------------|-----------------|
| <b>Fluorochrome</b>                                 | <b>Antigen</b> | <b>Cat-No</b> | <b>Lot-No</b> | <b>Clone</b> | <b>Dilution</b> |
| APC                                                 | CD3            | 555335        | 8316946       | UCHT1        | 1:200           |
| APC-H7                                              | CD8            | 641400        | 9225077       | SK1          | 1:200           |
| APC-R700                                            | CD127          | 565185        | 9220640       | HIL-7R-M21   | 1:100           |
| BV421                                               | CD25           | 562442        | 9095648       | M-A251       | 1:100           |
| BV510                                               | Vg9            | 744035        | 9086901       | B3           | 1:200           |
| BV605                                               | CD20           | 747736        | 9308431       | 2H7          | 1:200           |
| FITC                                                | CD4            | 345768        | 9008510       | SK3          | 1:200           |
| PE                                                  | TCRgd          | 333141        | 9191485       | 11F2         | 1:200           |
| PE                                                  | CD19           | 555413        | 8235921       | HIB19        | 1:50            |
| PE-Cy7                                              | CD56           | 335826        | 9196215       | NCAM16.2     | 1:100           |
| PerCP                                               | CD45           | 345809        | 9007823       | 2D1          | 1:200           |
| BD FACS-Lysing Solution                             |                | 349202        | 9141933       |              |                 |
| BD Trucount™ Tubes                                  |                | 340334        | 19207         |              |                 |
| <b>Memory Marker Assay: Antibodies and Reagents</b> |                |               |               |              |                 |
| APC                                                 | CD3            | 555335        | 8316946       | UCHT1        | 1:200           |
| APC-H7                                              | CD8            | 641400        | 9225077       | SK1          | 1:200           |
| APC-R700                                            | CD127          | 565185        | 9220640       | HIL-7R-M21   | 1:100           |
| BV421                                               | CD25           | 562442        | 9095648       | M-A251       | 1:100           |
| BV510                                               | CD45RA         | 563031        | 9014627       | HI100        | 1:200           |
| BV605                                               | CD62L          | 562719        | 8173613       | DREG-56      | 1:100           |
| FITC                                                | CD4            | 345768        | 9008510       | SK3          | 1:200           |
| PE                                                  | TCRgd          | 333141        | 9191485       | 11F2         | 1:200           |
| PE                                                  | CD19           | 555413        | 8235921       | HIB19        | 1:50            |
| PE-Cy7                                              | CD56           | 335826        | 9196215       | NCAM16.2     | 1:100           |
| PerCP                                               | ViaProbe       | 555816        | 9052709       |              | 1:10            |
| Ammonium Chloride Lysis                             |                | House made    |               |              | 0,83%           |

19 **Figure legends**

20 Supplementary Figure 1: Lymphopenia in COVID-19 patients is inversely correlated with  
21 disease severity. Lines represent median. Statistical analysis was performed by Mann-  
22 Whitney U-test or Student's t test where applicable. \* $p < 0.05$ , \*\*\*\* $p < 0.0001$ ; HC: Healthy  
23 Control. MD: Mild Disease; SD: Severe Disease.

24 Supplementary Figure 2: Gating strategy

25 (A) Gating strategy for analysis of total cell counts. (B) Gating strategy for analysis of  
26 memory markers. Arrows indicate gating hierarchy. Antibody specifications are listed in  
27 Supplementary Table 2.

28 Supplementary Figure 3: Mild COVID-19 disease is paralleled by increased absolute counts  
29 of effector and memory T cells.

30 (A) Gated on  $CD4_{conv}$ . (B) Gated on  $CD8^+$  T cells. Lines represent median. Statistical  
31 analysis was performed by Mann-Whitney U-test or Student's t test where applicable. \* $p <$   
32  $0.05$ , \*\* $p < 0.01$ , \*\*\* $p < 0.001$ , \*\*\*\* $p < 0.0001$ ; HC: Healthy Control. MD: Mild Disease;  
33 SD: Severe Disease.

34 Supplementary Figure 4: Longitudinal distribution of  $\gamma\delta$  T cells memory markers in  
35 convalescing and non-convalescing patients.

36 Y axis displays the percentage of all  $\gamma\delta$  T cells; Blue diamonds represent mild disease and red  
37 diamonds severe disease patients upon admission. ns: not significant.

38

39 Supplementary Figures:

**Sup. Figure 1**

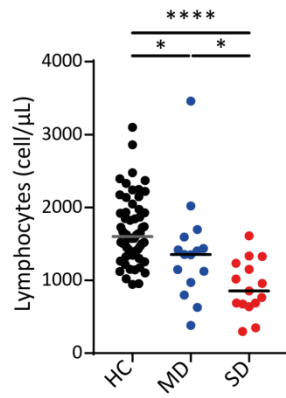

Sup. Figure 2

A

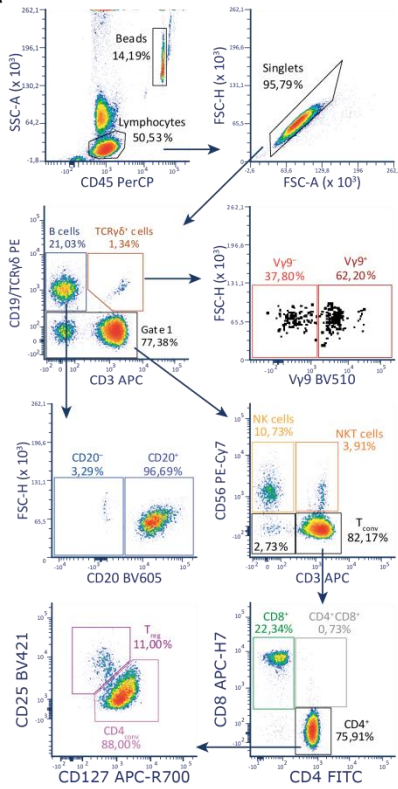

41

42

B

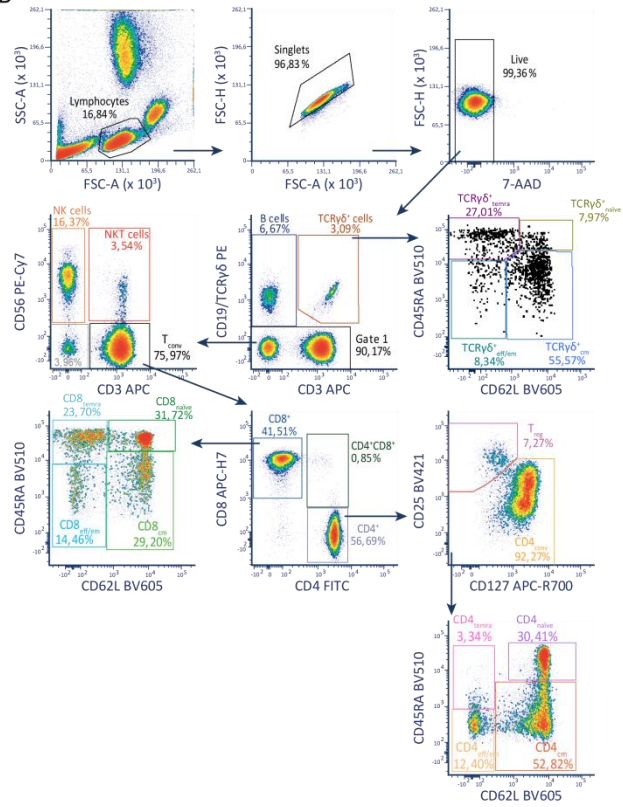

### Sup. Figure 3

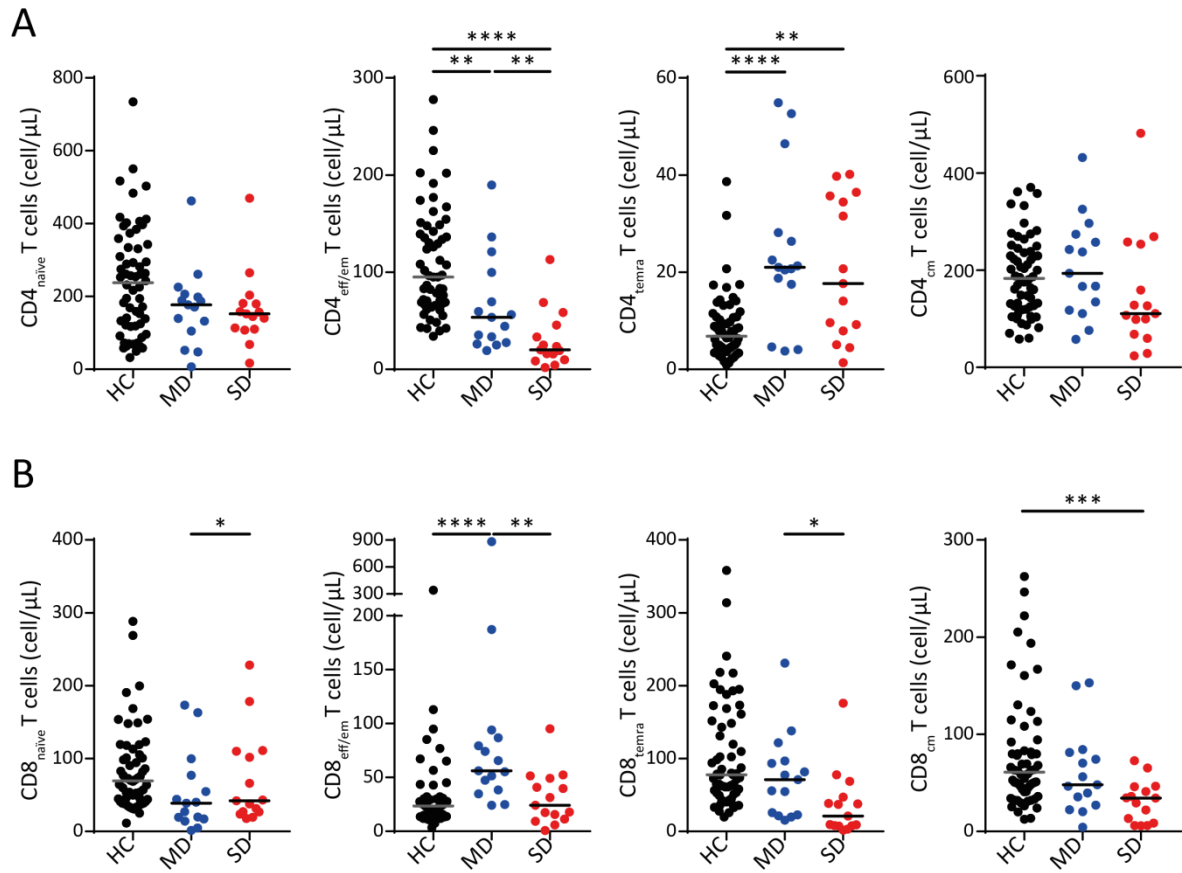

### Sup. Figure 4

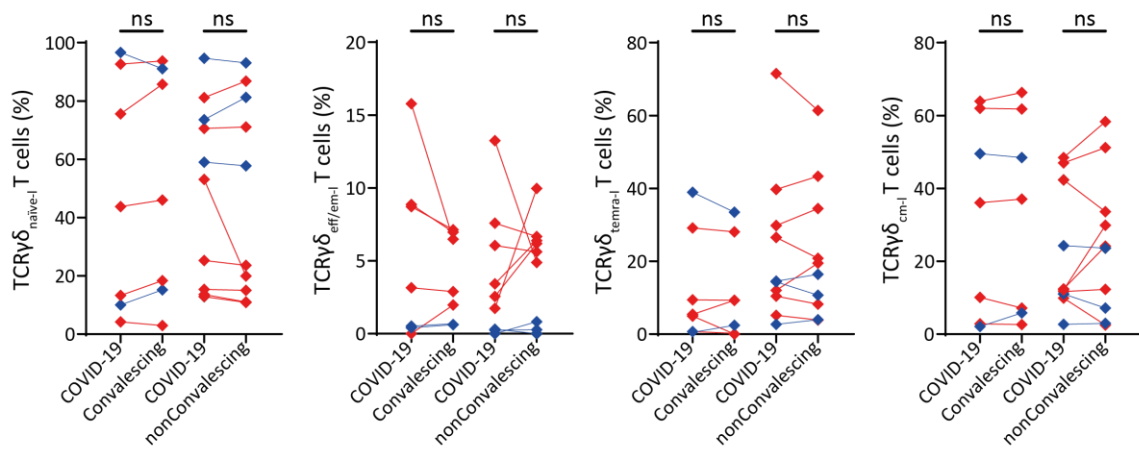

Supplement: Supplementary file [file 2020.05.11.20096263-1.pdf]
